# Supplementary material for: A nomogram for predicting hyperprogressive disease after immune checkpoint inhibitor treatment in lung cancer
Source: PubMed Central journal article supplement — Transl Lung Cancer Res. 2022 Apr;11(4):607–16. doi: 10.21037/tlcr-22-171 (PMC9073744; doi:10.21037/tlcr-22-171), 2022-04
Supplement: tlcr-11-04-607-supplementary.pdf [file tlcr-11-04-607-supplementary.pdf]

**Table S1** Normal range of all laboratory test

| Laboratory data                                                   | Normal range |
|-------------------------------------------------------------------|--------------|
| C reactive protein (mg/L)                                         | 0.50-10.00   |
| D dimer (mg/L)                                                    | 0-0.55       |
| Percentage of neutrophils                                         | 40.0-75.0    |
| Neutrophil count ( $10^9/L$ )                                     | 1.8-6.3      |
| Lactate dehydrogenase (U/L)                                       | 120-250      |
| Percentage of monocytes                                           | 3-10         |
| Monocyte count ( $10^9/L$ )                                       | 0.1-0.6      |
| Percentage of basophils                                           | 0-1.0        |
| Basophil count ( $10^9/L$ )                                       | 0-0.06       |
| Percentage of eosinophils                                         | 0.4-8.0      |
| Eosinophil count ( $10^9/L$ )                                     | 0-0.5        |
| International normalization ratio                                 | 0.8-1.5      |
| Large platelet ratio                                              | 13.00-43.00  |
| Urea (mmol/L)                                                     | 3.1-9.5      |
| Uric acid ( $\mu\text{mol/L}$ )                                   | 208-428      |
| Mean red blood cell volume (fl)                                   | 82.0-100.0   |
| Average hemoglobin content (pg)                                   | 27.0-34.0    |
| Mean corpuscular hemoglobin concentration (pg)                    | 316-354      |
| Mean platelet volume (fl)                                         | 9.0-13.0     |
| Total cholesterol ( $\mu\text{mol/L}$ )                           | 3.0-5.7      |
| Total bile acid ( $\mu\text{mol/L}$ )                             | 0-15         |
| Total bilirubin ( $\mu\text{mol/L}$ )                             | 5.0-21.0     |
| Total protein (g/L)                                               | 65-85        |
| Chloride ion (nmol/L)                                             | 99-110       |
| Activated partial prothrombin time (second)                       | 20.1-40.0    |
| Lymphocyte percentage                                             | 20.0-50.0    |
| Lymphocyte count ( $10^9/L$ )                                     | 1.1-3.2      |
| Triglycerides (mmol/L)                                            | 0-1.7        |
| Carcinoembryonic antigen (ng/mL)                                  | 0-5.00       |
| Albumin ratio                                                     | 1.20-2.40    |
| White blood cell count ( $10^9/L$ )                               | 3.5-9.5      |
| Albumin (g/L)                                                     | 35-52        |
| Direct bilirubin ( $\mu\text{mol/L}$ )                            | 0-3.4        |
| Alkaline phosphatase (U/L)                                        | 30-120       |
| Phosphorus (nmol/L)                                               | 0.9-1.5      |
| Neuronal specific enolase (ng/mL)                                 | 0-25.00      |
| Glycated albumin (%)                                              | 11.0-16.0    |
| Glycosylated hemoglobin (%)                                       | 4-6          |
| Carbohydrate antigen 125 (U/mL)                                   | 0-35.00      |
| Coefficient of variation of red blood cell distribution width (%) | 11.0-16.0    |
| Standard deviation of red blood cell distribution width (fl)      | 37.0-54.0    |
| Hematocrit (%)                                                    | 35.0-45.0    |
| Red blood cell count ( $10^{12}/L$ )                              | 3.8-5.1      |
| Fibrinogen (g/L)                                                  | 2.0-4.0      |
| Cytokeratin 19 fragment (ng/mL)                                   | 0-5.00       |
| Myoglobin (ng/mL)                                                 | 0-70.0       |
| Creatinine ( $\mu\text{mol/L}$ )                                  | 57-111       |
| Creatine Kinase (U/L)                                             | 50-310       |
| Creatine Kinase Isoenzyme MB (ng/mL)                              | 0.3-0.4      |
| Troponin I (ng/mL)                                                | 0-0.03       |
| Cholinesterase (KU/L)                                             | 4.6-11.5     |
| Cystatin c (mg/L)                                                 | 0.5-1.6      |
| Glucose (mmol/L)                                                  | 4.3-5.9      |
| Platelet distribution width (fl)                                  | 9-17         |
| Platelet packed volume (fl)                                       | 9.0-13.0     |
| Platelet count                                                    | 125-350      |
| Erythrocyte sedimentation rate                                    | 0-40         |
| Angiotensin converting enzyme (mm/1 h)                            | 18.0-55.0    |
| Hemoglobin concentration (g/L)                                    | 115-150      |
| Retinol-binding protein (mg/L)                                    | 25-70        |
| Superoxide dismutase (mmol/L)                                     | 129-216      |
| Calcium (mmol/L)                                                  | 2.1-2.5      |
| Sodium ion (mmol/L)                                               | 137-147      |
| Potassium ion (mmol/L)                                            | 3.5-5.3      |
| Magnesium (mmol/L)                                                | 0.75-1.02    |
| Aspartate aminotransferase (U/L)                                  | 15-40        |
| HDL cholesterol (mmol/L)                                          | 0.8-1.8      |
| Squamous cell carcinoma antigen (ng/mL)                           | 0-1.50       |

**Table S2** Univariate logistic regression analysis (compared to the HPD set)

| Laboratory data                                                   | P value | OR (95% CI)                   |
|-------------------------------------------------------------------|---------|-------------------------------|
| C reactive protein (mg/L)                                         | 0.516   | 0.997 (0.988-1.006)           |
| D dimer (mg/L)                                                    | 0.015   | 0.924 (0.867-0.985)           |
| Percentage of neutrophils                                         | 0.003   | 0.964 (0.941-0.988)           |
| Neutrophil count                                                  | 0.032   | 0.953 (0.913-0.996)           |
| Lactate dehydrogenase (U/L)                                       | 0.000   | 0.986 (0.983-0.990)           |
| Percentage of monocytes                                           | 0.323   | 0.927 (0.799-1.007)           |
| Monocyte count                                                    | 0.134   | 0.432 (0.144-1.297)           |
| Percentage of basophils                                           | 0.912   | 1.065 (0.349-3.251)           |
| Basophil count                                                    | 0.683   | 0.053 (0.000-73,721.349)      |
| Percentage of eosinophils                                         | 0.529   | 0.964 (0.861-1.080)           |
| Eosinophil count                                                  | 0.538   | 0.672 (0.190-2.381)           |
| International normalization ratio                                 | 0.770   | 0.707 (0.069-7.237)           |
| Large platelet ratio                                              | 0.939   | 0.999 (0.968-1.030)           |
| Urea (mmol/L)                                                     | 0.324   | 0.903 (0.737-1.106)           |
| Uric acid (μmol/L)                                                | 0.404   | 0.998 (0.995-1.002)           |
| Mean red blood cell volume (fl)                                   | 0.923   | 1.002 (0.955-1.052)           |
| Average hemoglobin content (pg)                                   | 0.168   | 1.086 (0.966-1.222)           |
| Mean corpuscular hemoglobin concentration (pg)                    | 0.004   | 1.040 (1.013-1.068)           |
| Mean platelet volume (fl)                                         | 0.972   | 0.996 (0.807-1.230)           |
| Total cholesterol (mmol/L)                                        | 0.231   | 0.606 (0.267-1.376)           |
| Total bile acid (μmol/L)                                          | 0.510   | 1.025 (0.953-1.101)           |
| Total bilirubin (μmol/L)                                          | 0.403   | 1.036 (0.953-1.127)           |
| Total protein (g/L)                                               | 0.196   | 0.961 (0.906-1.021)           |
| Chloride ion (nmol/L)                                             | 0.620   | 0.973 (0.872-1.085)           |
| Activated partial prothrombin time (second)                       | 0.663   | 1.013 (0.957-1.072)           |
| Lymphocyte percentage                                             | 0.002   | 1.058 (1.020-1.097)           |
| Lymphocyte count                                                  | 0.004   | 2.188 (1.277-3.749)           |
| Triglycerides (mmol/L)                                            | 0.887   | 1.061 (0.471-2.388)           |
| Carcinoembryonic antigen (ng/mL)                                  | 0.646   | 0.998 (0.989-1.007)           |
| Albumin ratio                                                     | 0.832   | 0.868 (0.236-3.197)           |
| White blood cell count                                            | 0.082   | 0.948 (0.893-1.007)           |
| Albumin (g/L)                                                     | 0.303   | 0.955 (0.874-1.043)           |
| Direct bilirubin (μmol/L)                                         | 0.339   | 1.150 (0.863-1.532)           |
| Alkaline phosphatase (U/L)                                        | 0.306   | 0.995 (0.987-1.004)           |
| Phosphorus (nmol/L)                                               | 0.072   | 0.104 (0.009-1.221)           |
| Neuronal specific enolase (ng/mL)                                 | 0.050   | 0.993 (0.986-1.000)           |
| Glycated Albumin (%)                                              | 0.546   | 0.949 (0.800-1.125)           |
| Glycosylated hemoglobin (%)                                       | 0.551   | 1.127 (0.638-2.321)           |
| Carbohydrate antigen 125 (U/mL)                                   | 0.669   | 0.999 (0.995-1.003)           |
| Coefficient of variation of red blood cell distribution width (%) | 0.204   | 0.844 (0.650-1.096)           |
| Standard deviation of red blood cell distribution width (fl)      | 0.557   | 0.976 (0.902-1.057)           |
| Hematocrit (%)                                                    | 0.107   | 1.048 (0.990-1.108)           |
| Red blood cell count                                              | 0.697   | 1.032 (0.881-1.208)           |
| Fibrinogen (g/L)                                                  | 0.690   | 0.965 (0.809-1.150)           |
| Cytokeratin 19 fragment (ng/mL)                                   | 0.350   | 0.994 (0.981-1.007)           |
| Myoglobin (ng/mL)                                                 | 0.878   | 1.004 (0.955-1.055)           |
| Creatinine (μmol/L)                                               | 0.851   | 0.998 (0.976-1.020)           |
| Creatine Kinase (U/L)                                             | 0.626   | 0.999 (0.997-1.002)           |
| Creatine Kinase Isoenzyme MB (ng/mL)                              | 0.931   | 0.992 (0.825-1.192)           |
| Troponin I (ng/mL)                                                | 0.747   | 1,017,255.1 (0.000-3.565E+42) |
| Cholinesterase (KU/L)                                             | 0.782   | 1.028 (0.847-1.246)           |
| Cystatin c (mg/L)                                                 | 0.280   | 2.926 (0.416-20.558)          |
| Glucose (mmol/L)                                                  | 0.342   | 0.933 (0.809-1.076)           |
| Platelet distribution width (fl)                                  | 0.767   | 0.922 (0.541-1.574)           |
| Platelet packed volume (fl)                                       | 0.221   | 10.286 (0.247-128.838)        |
| Platelet count                                                    | 0.963   | 1.000 (0.997-1.003)           |
| Erythrocyte sedimentation rate                                    | 0.001   | 0.989 (0.982-0.996)           |
| Angiotensin converting enzyme (mm/1 h)                            | 0.895   | 0.989 (0.841-1.163)           |
| Hemoglobin concentration (g/L)                                    | 0.026   | 1.018 (1.002-1.034)           |
| Retinol-binding protein (mg/L)                                    | 0.069   | 0.970 (0.939-1.002)           |
| Superoxide dismutase (mmol/L)                                     | 0.833   | 0.995 (0.950-1.042)           |
| Calcium (mmol/L)                                                  | 0.413   | 2.896 (0.227-36.908)          |
| Sodium ion (mmol/L)                                               | 0.620   | 1.029 (0.918-1.154)           |
| Potassium ion (mmol/L)                                            | 0.903   | 1.057 (0.435-2.567)           |
| Magnesium (mmol/L)                                                | 0.307   | 0.052 (0.000-15.075)          |
| Aspartate aminotransferase (U/L)                                  | 0.256   | 1.026 (0.982-1.073)           |
| HDL cholesterol (mmol/L)                                          | 0.163   | 12.589 (0.359-440.929)        |
| Squamous cell carcinoma antigen (ng/mL)                           | 0.873   | 0.993 (0.911-1.083)           |

CI, confidence interval; OR, odds ratio.
